# Supplementary material for: Synthesis of graphene mesosponge via catalytic methane decomposition on magnesium oxide
Source: Royal Society of Chemistry journal article supplement (doi:10.1039/d1ta02326h), 2021-01-01
Supplement: d1ta02326h1.pdf [file d1ta02326h1.pdf]

## Supplementary Information

### **Synthesis of graphene mesosponge via catalytic methane decomposition on magnesium oxide**

*Shogo Sunahiro,<sup>a</sup> Keita Nomura,<sup>b</sup> Shunsuke Goto,<sup>b</sup> Kazuya Kanamaru,<sup>b</sup> Rui Tang,<sup>c</sup> Masanori Yamamoto,<sup>b</sup> Takeharu Yoshii,<sup>b</sup> Junko N. Kondo,<sup>d</sup> Qi Zhao,<sup>e</sup> Azeem Ghulam Nabi,<sup>e</sup> Rachel Crespo-Otero,<sup>e</sup> Devis Di Tommaso,<sup>e</sup> Takashi Kyotani<sup>b</sup> and Hiroto Nishihara<sup>\*bc</sup>*

*<sup>a</sup>R & D Strategy Division, Tokai Carbon Co., Ltd., Aoyama Building, 1-2-3 Kita Aoyama, Minato-ku, Tokyo, 107-8636, Japan*

*<sup>b</sup>Institute of Multidisciplinary Research for Advance Materials, Tohoku University, 2-1-1 Katahira, Aoba-ku, Sendai, Miyagi, 980-8577, Japan.*

*<sup>c</sup>Advanced Institute for Materials Research, Tohoku University, 2-1-1 Katahira, Aoba-ku, Sendai, Miyagi, 980-8577, Japan.*

*<sup>d</sup>Institute of Innovative Research, Tokyo Institute of Technology, 4259 Nagatsuda Midori-ku, Yokohama 226-8503, Japan*

*<sup>e</sup>School of Biological and Chemical Sciences, Queen Mary University of London, Mile End Road, London E1 4NS, United Kingdom*

*\*E-mail: [hirotomo.nishihara.b1@tohoku.ac.jp](mailto:hirotomo.nishihara.b1@tohoku.ac.jp)*

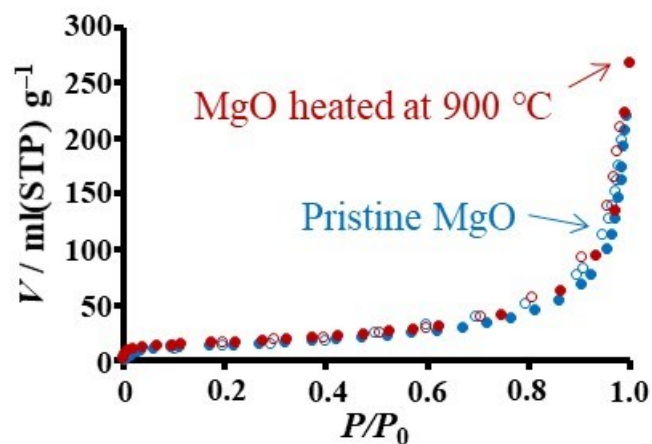

**Fig. S1**  $\text{N}_2$  adsorption/desorption isotherms of MgO before and after the heat treatment at 900 °C. The amount of  $\text{N}_2$  adsorption of MgO after the heat treatment slightly increases at a low  $P/P_0$ , and the specific surface area is increased from 50 to 61  $\text{m}^2 \text{g}^{-1}$  by the heat treatment.

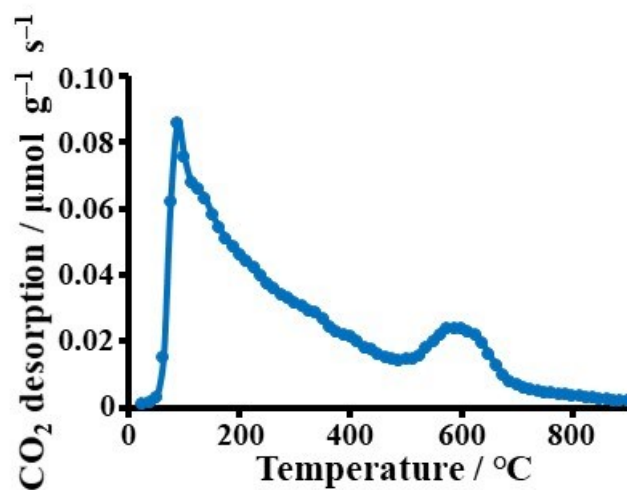

**Fig. S2** The profiles of  $\text{CO}_2$ -TPD on MgO pre-heated at 500 °C.

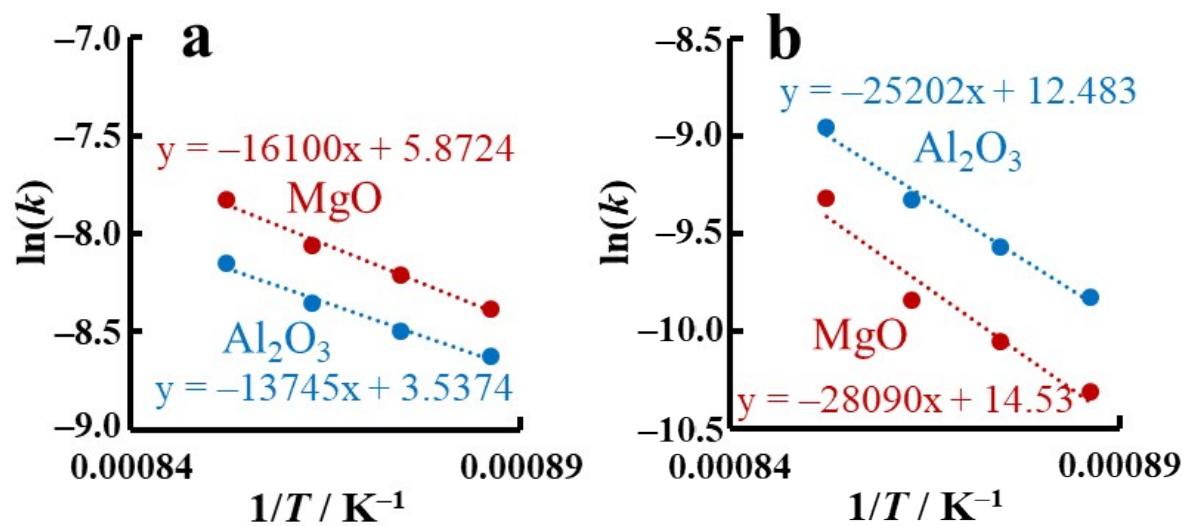

**Fig. S3** The Arrhenius plots of catalytic methane decomposition on MgO and Al<sub>2</sub>O<sub>3</sub> at (a)  $N_{\text{stack}} < 1$  and (b)  $N_{\text{stack}} > 1$ .

**Table S1** Calculated reaction enthalpy ( $H_f$ ) and activation energies for the forward ( $E_{a,f}^+$ ) and reverse ( $E_{a,r}^+$ ) elementary steps involved in the C–H activation on MgO(100) surface. Values in eV.

|                                                  | Forward activation energy | Enthalpy | Reverse activation energy |
|--------------------------------------------------|---------------------------|----------|---------------------------|
| Reaction                                         | $E_{a,f}^+$               | $H_f^+$  | $E_{a,r}^+$               |
| $\text{CH}_4 \rightarrow \text{CH}_3 + \text{H}$ | 4.55                      | 2.51     | 2.04                      |
| $\text{CH}_3 \rightarrow \text{CH}_2 + \text{H}$ | 4.27                      | 1.46     | 2.81                      |
| $\text{CH}_2 \rightarrow \text{CH} + \text{H}$   | 4.14                      | 3.01     | 1.13                      |
| $\text{CH} \rightarrow \text{C} + \text{H}$      | 3.85                      | 2.26     | 1.59                      |

**Table S2** Calculated reaction enthalpy ( $H_f$ ) and activation energies for the forward ( $E_{a,f}^+$ ) and reverse ( $E_{a,r}^+$ ) elementary steps involved in the C–H activation on Mg(110) surface. Values in eV.

|                                                  | Forward activation energy | Enthalpy | Reverse activation energy |
|--------------------------------------------------|---------------------------|----------|---------------------------|
| Reaction                                         | $E_{a,f}^+$               | $H_f^+$  | $E_{a,r}^+$               |
| $\text{CH}_4 \rightarrow \text{CH}_3 + \text{H}$ | 0.84                      | -0.36    | 1.20                      |
| $\text{CH}_3 \rightarrow \text{CH}_2 + \text{H}$ | 2.54                      | 0.40     | 2.14                      |
| $\text{CH}_2 \rightarrow \text{CH} + \text{H}$   | 2.98                      | 1.48     | 1.50                      |
| $\text{CH} \rightarrow \text{C} + \text{H}$      | 3.42                      | 1.83     | 1.59                      |

**Table S3** Calculated reaction enthalpy ( $H_f$ ) and activation energies for the forward ( $E_{a,f}^+$ ) and reverse ( $E_{a,r}^+$ ) elementary steps involved in the C–H activation on MgO(110) surface with a vacant O site. Values in eV.

|                                                  | Forward activation energy | Enthalpy | Reverse activation energy |
|--------------------------------------------------|---------------------------|----------|---------------------------|
| Reaction                                         | $E_{a,f}^+$               | $H_f^+$  | $E_{a,r}^+$               |
| $\text{CH}_4 \rightarrow \text{CH}_3 + \text{H}$ | 0.65                      | 0.3      | 0.35                      |
| $\text{CH}_3 \rightarrow \text{CH}_2 + \text{H}$ | 2.73                      | 1.33     | 1.40                      |
| $\text{CH}_2 \rightarrow \text{CH} + \text{H}$   | 1.39                      | -0.3     | 1.69                      |
| $\text{CH} \rightarrow \text{C} + \text{H}$      | 3.12                      | 0.6      | 2.52                      |

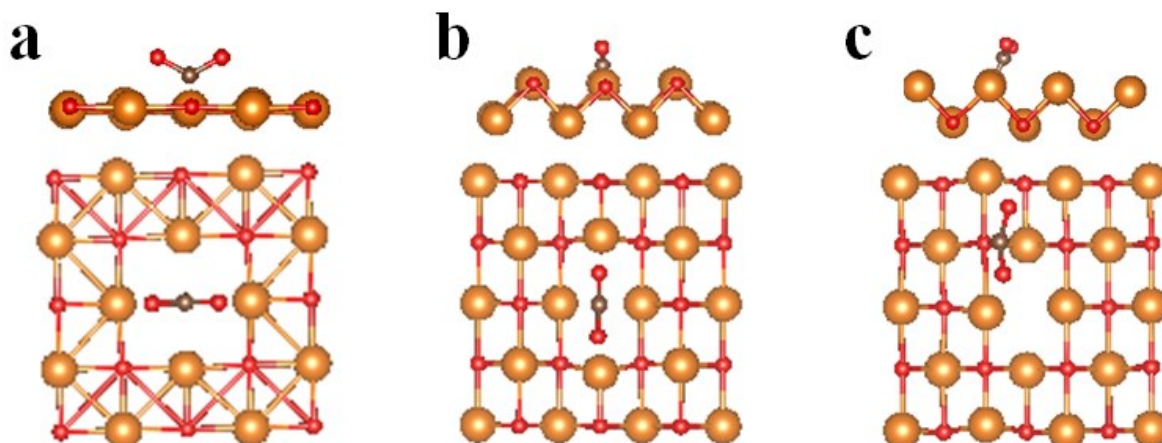

**Fig. S4** Illustrations for the calculation of CO<sub>2</sub> adsorption on MgO surface structures. (a) Flat MgO(100) surface with a vacant O site, MgO(100)V<sub>O</sub>. (b) Stepped MgO(110) surface with a vacant top-site O, MgO(110)V<sub>O-top</sub>. (c) Stepped MgO(110) surface with a bottom-site O, MgO(110)V<sub>O-bottom</sub>.

**Table S4** Calculated adsorption energies of CO<sub>2</sub> on the flat MgO(100) surface with a vacant O site, MgO(100) V<sub>O</sub>, and on the stepped MgO(110) surface with a vacant top-site O, V<sub>O-top</sub>, and bottom-site O, V<sub>O-bottom</sub>. Values in eV.

|                               | Adsorption energy |
|-------------------------------|-------------------|
| MgO(100)V <sub>O</sub>        | -0.91             |
| MgO(110)V <sub>O-top</sub>    | -3.39             |
| MgO(110)V <sub>O-bottom</sub> | -1.10             |

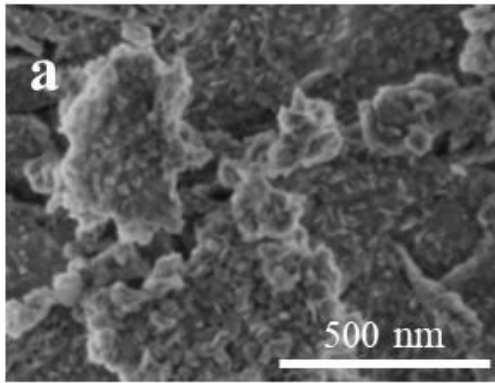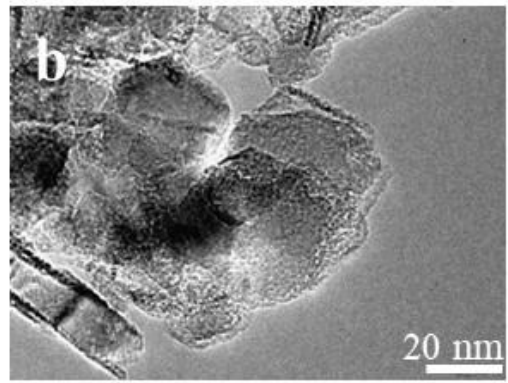

**Fig. S5** (a) SEM image of the pristine MgO. (b) TEM image of the pristine MgO.

**Table S5** Gas emission amount of CO, CO<sub>2</sub>, H<sub>2</sub>O, and H<sub>2</sub> during high-sensitivity vacuum TPD and elemental compositions of O and H.

| Sample                               | $N_{\text{CO}}^{\text{a}}$<br>(mmol g <sup>-1</sup> ) | $N_{\text{CO}_2}^{\text{b}}$<br>(mmol g <sup>-1</sup> ) | $N_{\text{H}_2\text{O}}^{\text{c}}$<br>(mmol g <sup>-1</sup> ) | $N_{\text{H}_2}^{\text{d}}$<br>(mmol g <sup>-1</sup> ) | $N_{\text{CO}} + N_{\text{H}_2}$<br>(mmol g <sup>-1</sup> ) | O <sup>e</sup><br>(wt%) | H <sup>f</sup><br>(wt%) |
|--------------------------------------|-------------------------------------------------------|---------------------------------------------------------|----------------------------------------------------------------|--------------------------------------------------------|-------------------------------------------------------------|-------------------------|-------------------------|
| YP-50F                               | 0.98                                                  | 0.07                                                    | 0.26                                                           | 2.12                                                   | 3.10                                                        | 2.21                    | 0.48                    |
| XC72                                 | 0.19                                                  | 0.03                                                    | 0.07                                                           | 0.41                                                   | 0.60                                                        | 0.51                    | 0.10                    |
| KB                                   | 0.17                                                  | 0.02                                                    | 0.05                                                           | 0.98                                                   | 1.15                                                        | 0.42                    | 0.21                    |
| BP                                   | 0.28                                                  | 0.12                                                    | 0.07                                                           | 0.61                                                   | 0.89                                                        | 0.94                    | 0.14                    |
| DB                                   | 1.6                                                   | 0.08                                                    | 0.21                                                           | 0.45                                                   | 2.05                                                        | 3.15                    | 0.13                    |
| CMS(Al <sub>2</sub> O <sub>3</sub> ) | 0.85                                                  | 0.13                                                    | 0.28                                                           | 1.06                                                   | 1.91                                                        | 2.21                    | 0.27                    |
| GMS(Al <sub>2</sub> O <sub>3</sub> ) | 0.07                                                  | 0.01                                                    | 0.03                                                           | 0.04                                                   | 0.11                                                        | 0.21                    | 0.01                    |
| CMS(MgO)                             | 0.95                                                  | 0.13                                                    | 0.34                                                           | 0.91                                                   | 1.86                                                        | 2.48                    | 0.25                    |
| GMS(MgO)                             | 0.02                                                  | 0.01                                                    | 0.03                                                           | 0.02                                                   | 0.05                                                        | 0.10                    | 0.01                    |

<sup>a</sup> CO emission amount.

<sup>b</sup> CO<sub>2</sub> emission amount

<sup>c</sup> H<sub>2</sub>O emission amount.

<sup>d</sup> H<sub>2</sub> emission amount.

<sup>e</sup> O content calculated from the gas emission amount of CO, CO<sub>2</sub>, and H<sub>2</sub>O.

<sup>f</sup> H content calculated from the gas emission amount of H<sub>2</sub>O and H<sub>2</sub>.

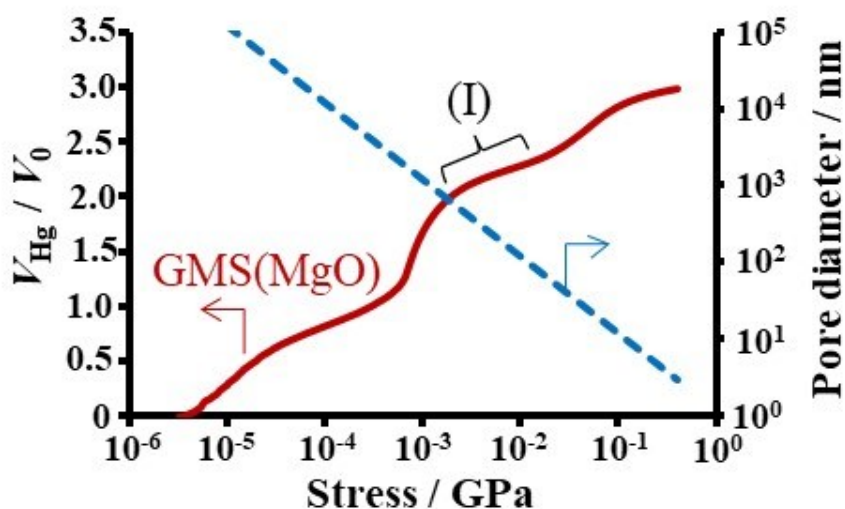

**Fig. S6**  $V_{\text{Hg}}/V_0$  versus stress loaded to MgO-derived GMS via Hg, which is measured by mercury porosimetry. The equation (8) gives the Hg pressure ( $P$ ) at which the pores with the radius of  $r$  are impregnated by Hg, and the relation of  $2r$  (pore diameter) and  $P$  is shown by a blue dashed line. The region (I) corresponds to stress-strain curve of GMS, and the bulk modulus can be calculated as 0.05 GPa.

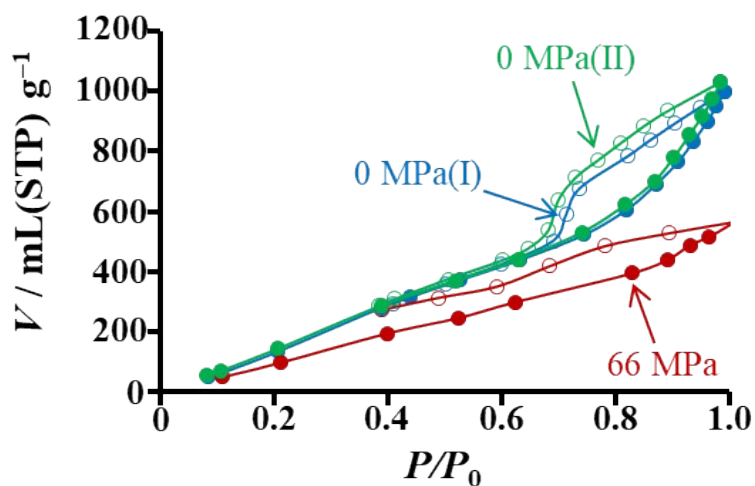

**Fig. S7** Methanol adsorption-desorption isotherms of MgO-derived GMS at 25 °C with and without loading mechanical force: before loading force (0 MPa(I)), loading 66 MPa, and after recovered to 0 MPa (0 MPa(II)).
